# Supplementary material for: pHUSH: a single vector system for conditional gene expression
Source: PubMed Central journal article supplement (PMC2174931; doi:10.1186/1472-6750-7-61), 2007-09-26
Supplement: 1472-6750-7-61-S3.pdf [file 1472-6750-7-61-S3.pdf]

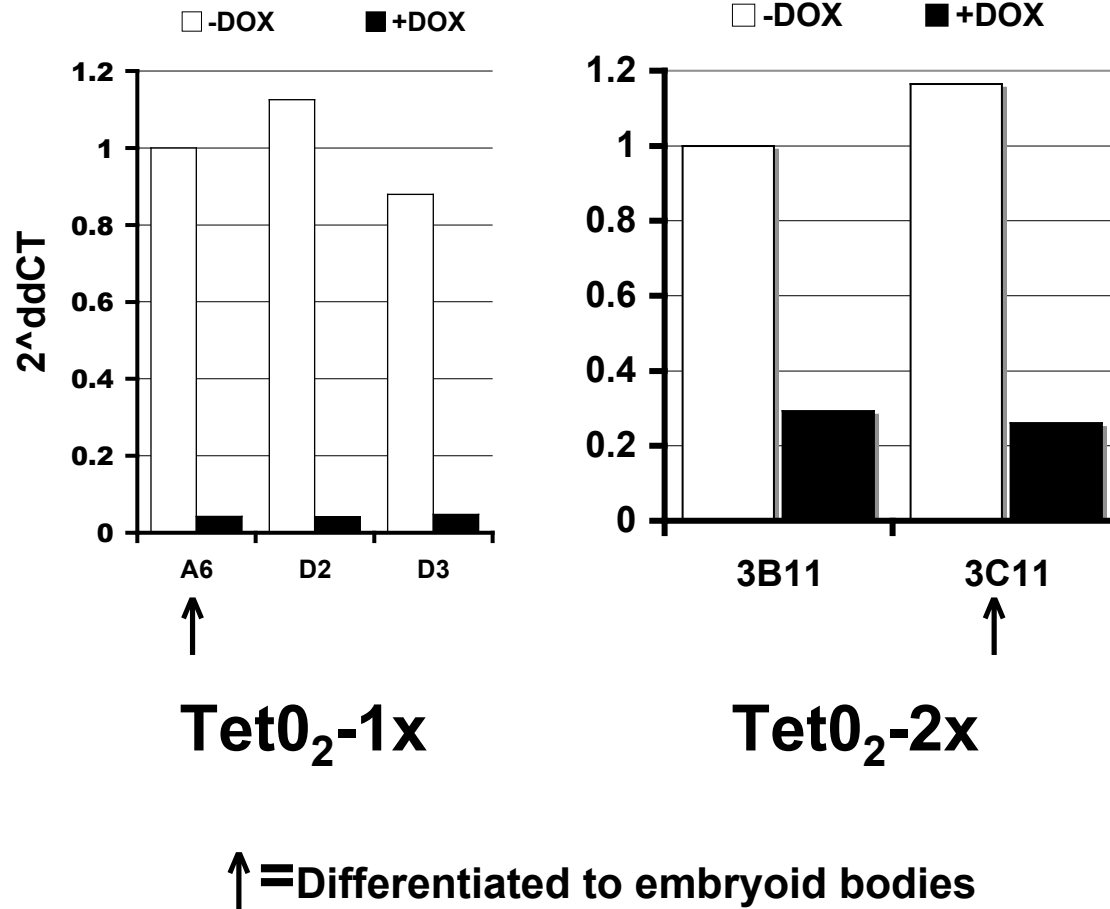

Additional Figure 3. Robust knockdown in undifferentiated murine embryonic stable clones derived with 1x and 2x-TetO<sub>2</sub>pHUSH vectors. Briefly, ES cells were electroporated and selected in 1-1.5ug/mL puromycin as described in the Methods section. Clones were first selected on the basis on high TetR expression, expanded and treated ±Dox for 48 hours. Knockdown was determined by qRT-PCR.
